# Supplementary material for: Refining Predictive Models for Sea Surface Currents: A Focus on Variable Configuration and Time Sequence Analysis
Source: Copernicus journal article supplement (doi:10.5194/egusphere-2024-3142), 2024-10-25
Supplement: Supplementary file [file egusphere-2024-3142-AC4-supplement.pdf]

**Table 1.** Tidal decompose vs. actual tidal and residual decompose vs. wind data ( $\rho$ DCCA)

| MONTH  | TIDAL DECOMPOSE VS ACTUAL TIDAL ( $\rho$ DCCA) |        |        |        | RESIDUAL DECOMPOSE VS WIND DATA ( $\rho$ DCCA) |        |        |        |
|--------|------------------------------------------------|--------|--------|--------|------------------------------------------------|--------|--------|--------|
|        | U_MIN                                          | U_MAX  | V_MIN  | V_MAX  | U_MIN                                          | U_MAX  | V_MIN  | V_MAX  |
| 0 (12) | 0,7856                                         | 0,3464 | 0,5755 | 0,5615 | 0,2289                                         | 0,2740 | 0,4845 | 0,2125 |
| 1      | 0,5680                                         | 0,2668 | 0,9483 | 0,2427 | 0,1026                                         | 0,1904 | 0,5079 | 0,1902 |
| 2      | 0,5239                                         | 0,2616 | 0,8787 | 0,2157 | 0,1765                                         | 0,0017 | 0,3817 | 0,6723 |
| 3      | 0,4393                                         | 0,5356 | 0,9523 | 0,7643 | 0,4473                                         | 0,1859 | 0,4823 | 0,4898 |
| 4      | 0,6635                                         | 0,6047 | 0,6610 | 0,7717 | 0,2795                                         | 0,0737 | 0,1568 | 0,2992 |
| 5      | 0,2217                                         | 0,2890 | 0,7791 | 0,6161 | 0,2264                                         | 0,0006 | 0,2478 | 0,3267 |
| 6      | 0,4839                                         | 0,8520 | 0,9433 | 0,5581 | 0,3534                                         | 0,7622 | 0,3423 | 0,4342 |
| 7      | 0,5031                                         | 0,7263 | 0,5135 | 0,6258 | 0,4662                                         | 0,7692 | 0,4945 | 0,1671 |
| 8      | 0,6184                                         | 0,6008 | 0,9522 | 0,8766 | 0,5322                                         | 0,3471 | 0,0835 | 0,0446 |
| 9      | 0,6963                                         | 0,5396 | 0,9319 | 0,7651 | 0,2075                                         | 0,2638 | 0,3067 | 0,2507 |
| 10     | 0,6570                                         | 0,7246 | 0,9342 | 0,5927 | 0,3129                                         | 0,2831 | 0,2696 | 0,2041 |
| 11     | 0,4563                                         | 0,7051 | 0,4386 | 0,8809 | 0,2334                                         | 0,2271 | 0,3499 | 0,1178 |

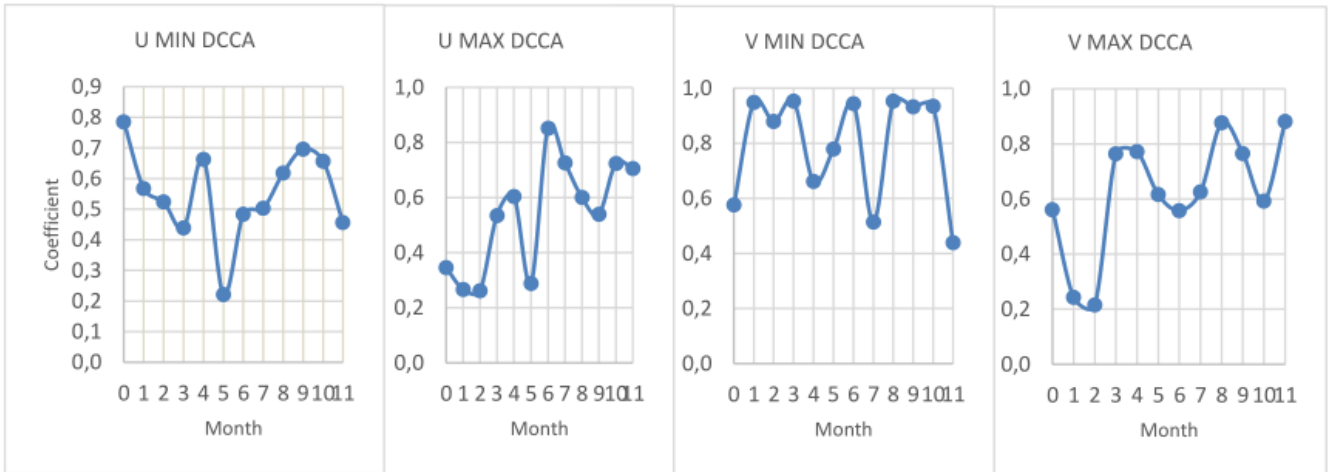

**Figure 5.** The plot of DCCA Value, decomposed tidal vs. actual tidal, for U min, U max, V min, and V max.

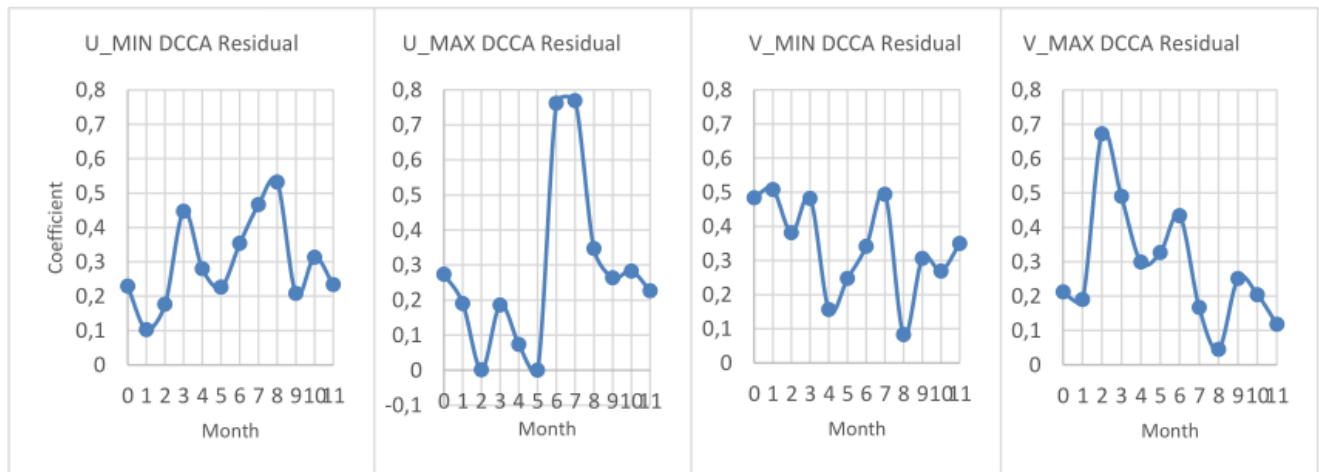

**Figure 6.** The plot of DCCA value, decomposed residual vs wind data, for U min, U max, V min, and V max.

435

440

445

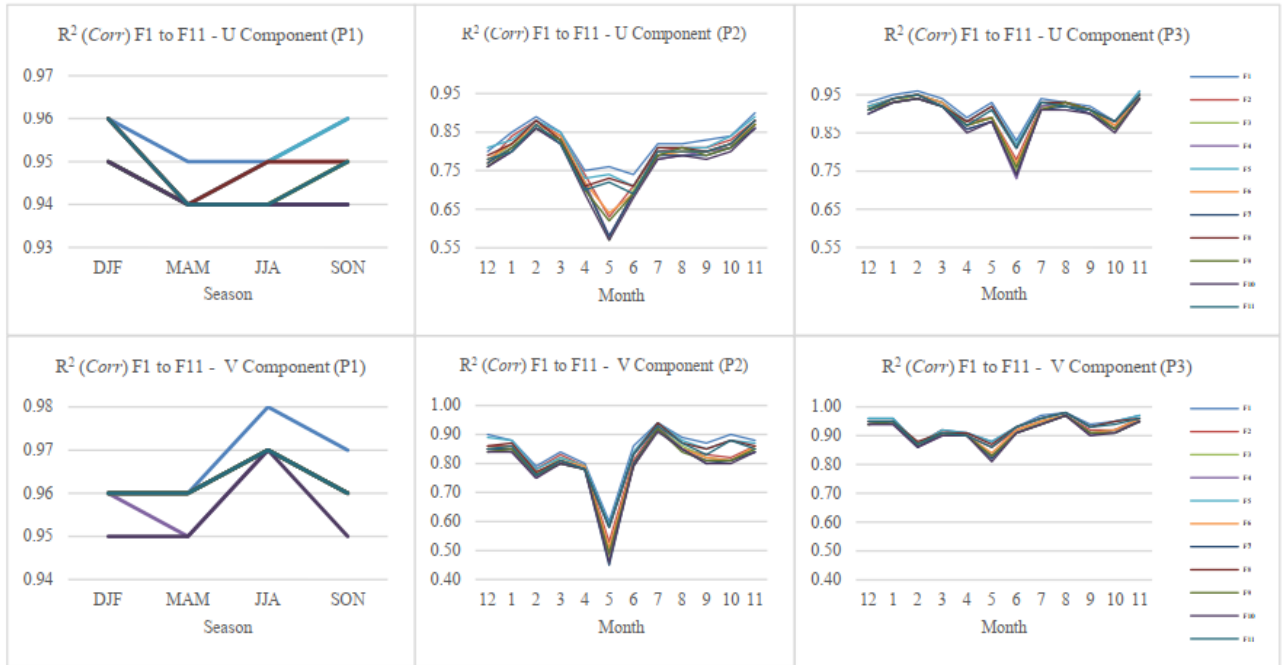

**Figure 6: Comparison of R2 Correlations for Prediction Schemes 1, 2, and 3**

450

455

460

465

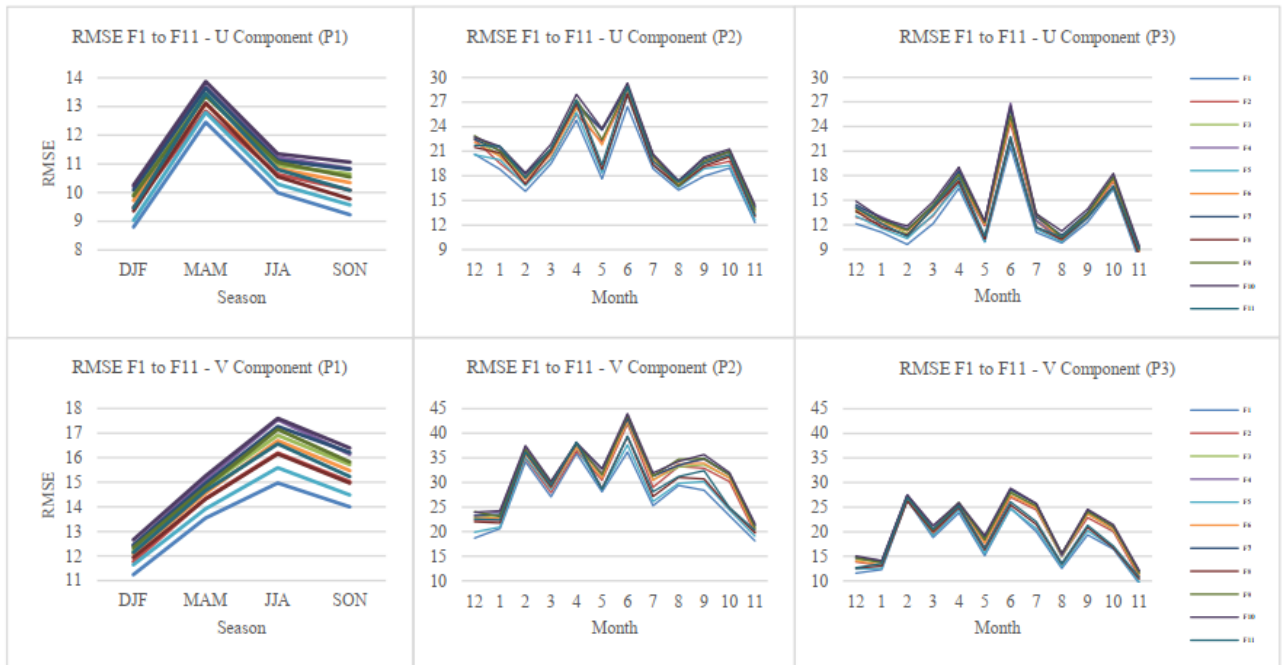

**Figure 7: Comparison of RMSE for Prediction Schemes 1, 2, and 3**
